# Supplementary material
Source: MDPI journal article supplement (https://www.mdpi.com/2571-841X/4/1/7)
Supplement: s1 [file s1]

A

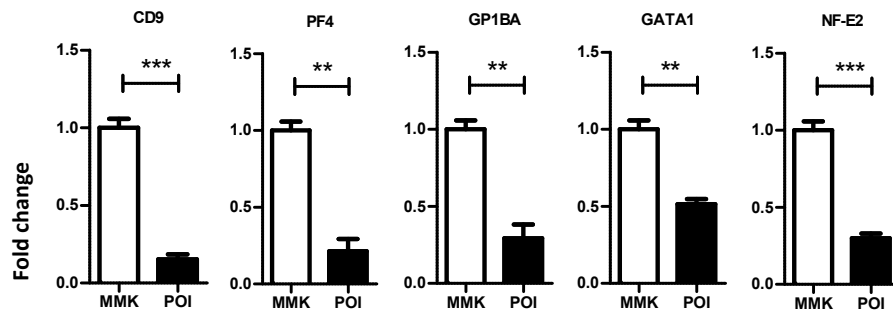

**Figure S1: Analysis of TF expression in POI.**

CD34<sup>+</sup> cells were cultured as in fig 1 for 10 days under control conditions or in the presence of SR1 (1  $\mu$ M). MMK (fig 3) or POI were sorted by flow cytometry, mRNA was extracted, and the level of *megakaryocytic TF* transcripts were quantified by qRT-PCR. The level of transcripts was normalized in MMK at 1. All the tested TFs are under expressed (CD9 : 0.15  $\pm$  0.03; PF4 : 0.21  $\pm$  0.08; GP1BA : 0.29  $\pm$  0.09; GATA1 : 0.51  $\pm$  0.03; NF-E2 : 0.3  $\pm$  0.03).

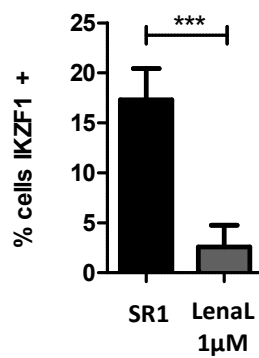

**Figure S2 : Analysis of cells positive for Ikaros in presence of Lenalidomid**

Bar graphs representing the percentage of cells expressing IKZF1 at day 10 in SR1 and Lenal conditions (17.3 $\pm$ 3.1 in SR1 vs 2.6 $\pm$ 2.2 with Lenal) (mean  $\pm$  SEM, N=3, \*\*\*p<0.001, Student t test)
